# Supplementary material for: Impact of Clinical Specialty Setting and Geographic Regions on Disease Management in Patients with Psoriatic Arthritis in the United States: A Multicenter Observational Study
Source: PubMed Central journal article supplement — Am J Clin Dermatol. 2019 Oct 14;20(6):873–80. doi: 10.1007/s40257-019-00470-6 (PMC6872709; doi:10.1007/s40257-019-00470-6), 2019-10-14
Supplement: 40257_2019_470_MOESM1_ESM.pdf [file 40257_2019_470_MOESM1_ESM.pdf]

## **Supplementary Appendix**

# **Impact of Clinical Specialty Setting and Geographic Regions on Disease Management in Patients with Psoriatic Arthritis in the United States**

Phillip J. Mease, Clive Liu, Evan Siegel, Heather Richmond, Meijing Wu, Liang Chen, Kevin Douglas, Benjamin Lockshin

American Journal of Clinical Dermatology, 2019

## Study sites and regions

LOOP was conducted across 44 sites in the USA that were categorized by geographic region. A total of 18 sites were from the Eastern region, which included the states of Georgia, Maryland, North Carolina, Pennsylvania, Rhode Island, West Virginia, and the territory of Puerto Rico; 12 sites were from the Western region, which included the states of California and Washington; and 14 sites were from the Central region, which included the states of Indiana, Michigan, and Texas.

**Supplementary Fig. 1.** LOOP study design

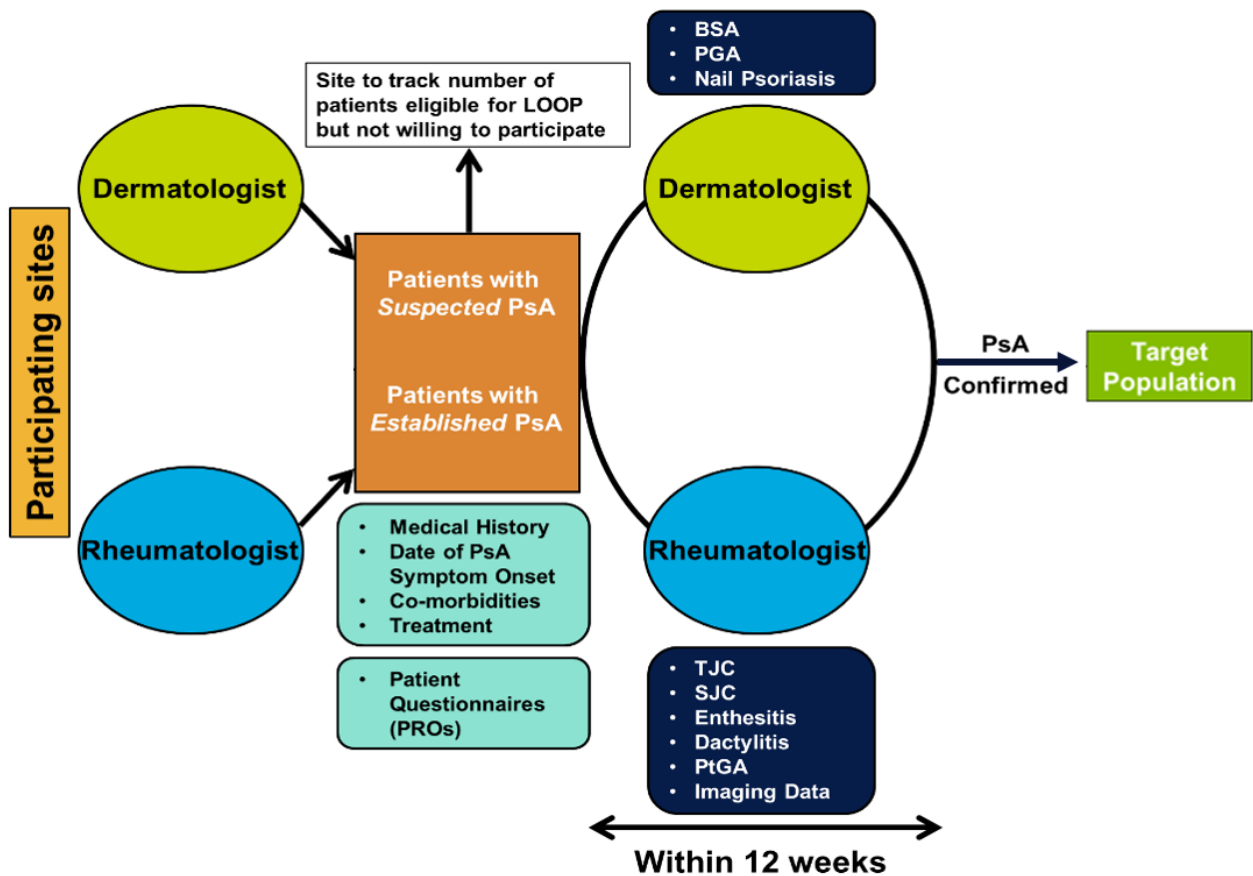

*BSA* body surface area, *PGA* Physician Global Assessment, *PRO* patient-reported outcome, *PsA* psoriatic arthritis, *PtGA* Patient Global Assessment, *SJC* swollen joint count, *TJC* tender joint count.

**Supplementary Fig. 2.** Distribution of time from symptom onset to PsA diagnosis by clinical specialty setting

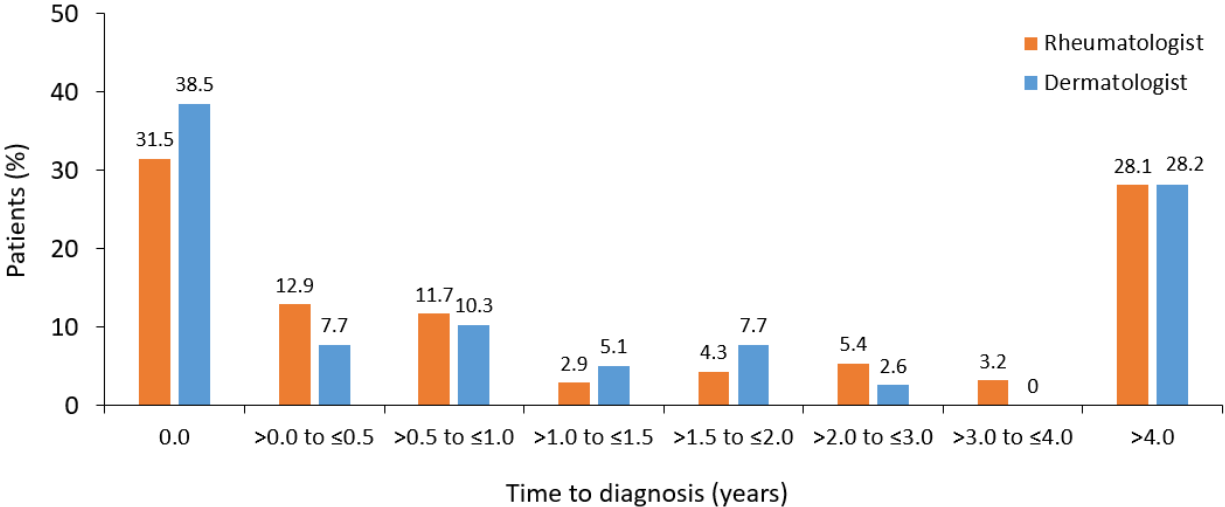

PsA psoriatic arthritis.
